# Supplementary material
Source: PubMed Central journal article supplement (PMC3318817)
Supplement: supp_78.8.2888_AEM7021-11_TableS1.pdf [file supp_78.8.2888_AEM7021-11_TableS1.pdf]

1 **Supplementary Table 1:** Primers sequences used in this study

| <b>Primers</b>         | <b>Sequences (5' to 3')<sup>a</sup></b> | <b>Reference or source</b> |
|------------------------|-----------------------------------------|----------------------------|
| <i>hrpA</i> p-F        | GTGGATCCTCGGCGTGACCTCTACTT              | This work                  |
| <i>hrpA</i> p-R        | CATGAATTCATTTTCTGCTCCTGGG               | This work                  |
| <i>hrpN</i> p-F        | AAGGATCCCCGTCGTCATCAACAGGC              | This work                  |
| <i>hrpN</i> p-R        | CATGAATTCGAGCGACGCACCAAGCTG             | This work                  |
| <i>hrpX</i> p-F        | GGAAAGCTTAGACTTGGGTATTTGGCATT-3'        | This work                  |
| <i>hrpX</i> p-R        | 5'-ATCGAATTCGCTCTCTTCTTTTGTCCAGC-3'     | This work                  |
| <i>hrpY</i> p-F        | 5'-GTGAAGCTTGATGGCATTGTCCGATAAAA-3'     | This work                  |
| <i>hrpY</i> p-R        | 5'-GCCGAATTCCTTCGCTGTACATGCTCAACA-3'    | This work                  |
| <i>hor</i> up-F        | AGAGGATCCAGTGACGGCAATCAAGGTTT           | This work                  |
| <i>hor</i> up-R        | TGTGAATTCGCTAAATCAGAACCTAACGG           | This work                  |
| <i>hor</i> down-F      | GTTAAGCTTCTATTATCTCCCGGCTGGAA           | This work                  |
| <i>hor</i> down-R      | GTA <u>CTCGAGATTC</u> ATGCTCAGTATCGTCT  | This work                  |
| <i>expl</i> up-F       | ATAGAGCTCAACTTTCGGCGGCAATG              | This work                  |
| <i>expl</i> up-R       | GCGGAAGCTTGCTAAAACTCACATCA              | This work                  |
| <i>expl</i> down-F     | GAGAAGCTTGCACAGACGATGAAAAG              | This work                  |
| <i>expl</i> down-R     | GCCGGATCCAGTGGGTTGATATTTAC              | This work                  |
| <i>expR</i> up-F       | GGTAGGATCCACGTTTTTATCCGAATGT            | This work                  |
| <i>expR</i> up-R       | GTGTGAATTCGGGTCAATATGCTGATAGT           | This work                  |
| <i>expR</i> down-F     | GGCGAAGCTTGGTCATCAGTTCAAATTG            | This work                  |
| <i>expR</i> down-R     | TCAACTCGAGATACTCACGATTGTCAGCC           | This work                  |
| <i>hrpA</i> qRT-F      | CAGCAATGGCAGGCATGCAG                    | This work                  |
| <i>hrpA</i> qRT-R      | CTGGCCGTCGGTGATTGAGC                    | This work                  |
| <i>hrpN</i> qRT-F      | TCGGCAGCGGTCTGAACGAC                    | This work                  |
| <i>hrpN</i> qRT-R      | CCAGCGACAACGGCGAGAA                     | This work                  |
| <i>hrpS</i> qRT-F      | TGGAAGGCGAAACCGGCACC                    | This work                  |
| <i>hrpS</i> qRT-R      | GCACGGCGGCAGTTCAC                       | This work                  |
| <i>hrpL</i> qRT-F      | GATGATGCTGCTGGATGCCGATGT                | This work                  |
| <i>hrpL</i> qRT-R      | TGCATCAACAGCCTGGCGGAGATA                | This work                  |
| <i>slyA</i> qRT-F      | TGCCGTTAGGTTCTGATTTA                    | This work                  |
| <i>slyA</i> qRT-R      | GGGAGATAATAGTGGCCAAC                    | This work                  |
| <i>hrpA</i> F-Northern | GGGACTTTCTAACGCAGCAG                    | This work                  |
| <i>hrpA</i> R-Northern | AATAGCTTTGGCCGCTTTCT                    | This work                  |
| <i>rsmA</i> F-Northern | CGAGTTGGCGAAACCCTCAT                    | This work                  |
| <i>rsmA</i> R-Northern | AATAGGAGGTAGGCTGAGAC                    | This work                  |
| <i>rsmB</i> F-Northern | CGCGATTTTTGTACGGCTAT                    | This work                  |
| <i>rsmB</i> R-Northern | CGATTTCTCGGTTCCCTCTT                    | This work                  |

2 <sup>a</sup> Restriction enzyme sites are underlined.
